# Supplementary material for: Structures and photophysical performances of (fluoro)salicylate stabilized polyoxo-titanium clusters
Source: Royal Society of Chemistry journal article supplement (doi:10.1039/c8ce00150b), 2018-01-01
Supplement: c8ce00150b1.pdf [file c8ce00150b1.pdf]

***Supporting Information for:***

**Structures and photophysical performances of (fluoro)salicylate  
stabilized polyoxo-titanium clusters**

**Bang-Chang Zhu,<sup>a</sup> Wei-Hui Fang,<sup>\*a</sup> Perumal Emayavaramban,<sup>a</sup> Lei Zhang,<sup>\*a</sup> and Jian Zhang<sup>a</sup>**

*<sup>a</sup>State Key Laboratory of Structural Chemistry, Fujian Institute of Research on the Structure of Matter, Chinese Academy of Sciences, Fuzhou, Fujian 350002, China.*

Corresponding Author

\*E-mail: [fwh@fjirsm.ac.cn](mailto:fwh@fjirsm.ac.cn); [LZhang@fjirsm.ac.cn](mailto:LZhang@fjirsm.ac.cn)

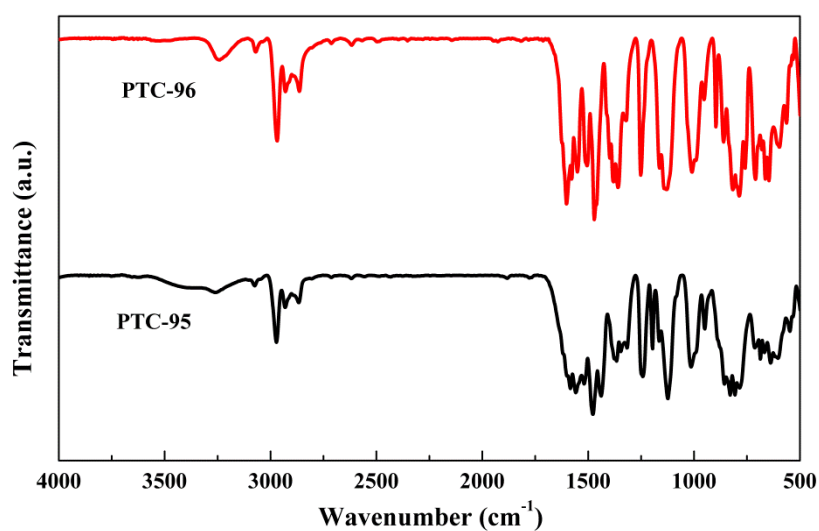

Fig. S1. FT-IR spectra for compounds **PTC-95** and **PTC-96**.

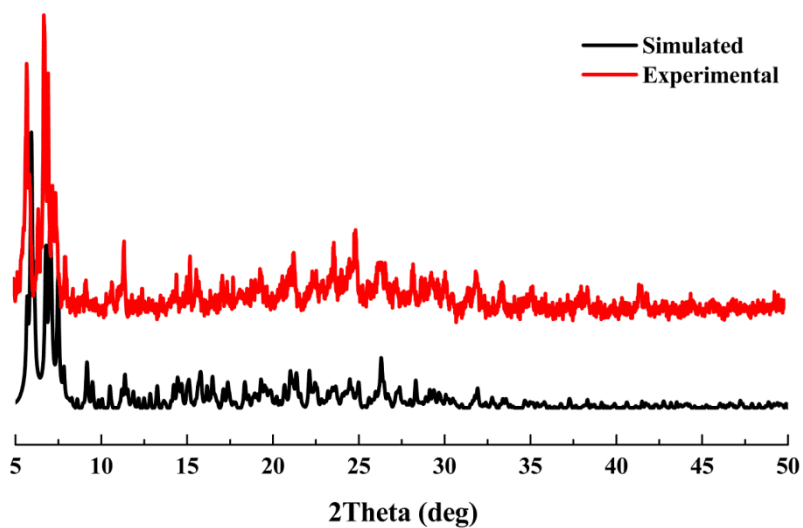

Fig. S2. The powder patterns of compound **PTC-95**.

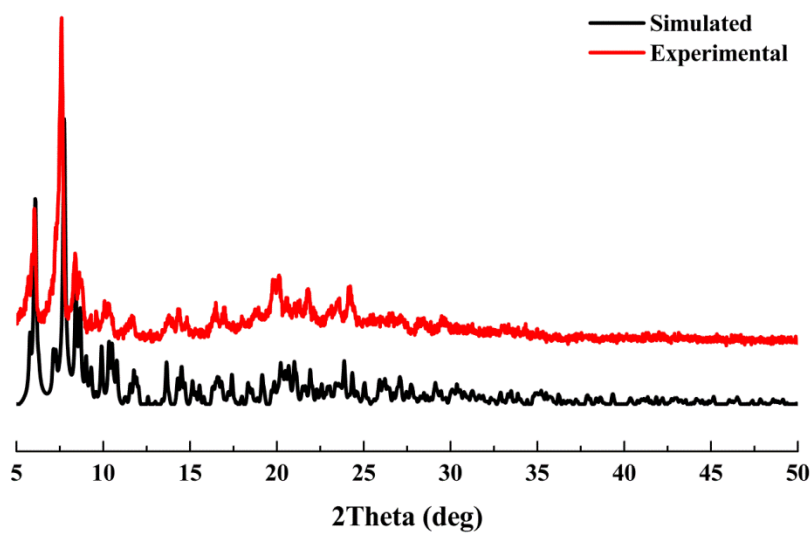

Fig. S3. The powder patterns of compound **PTC-96**.

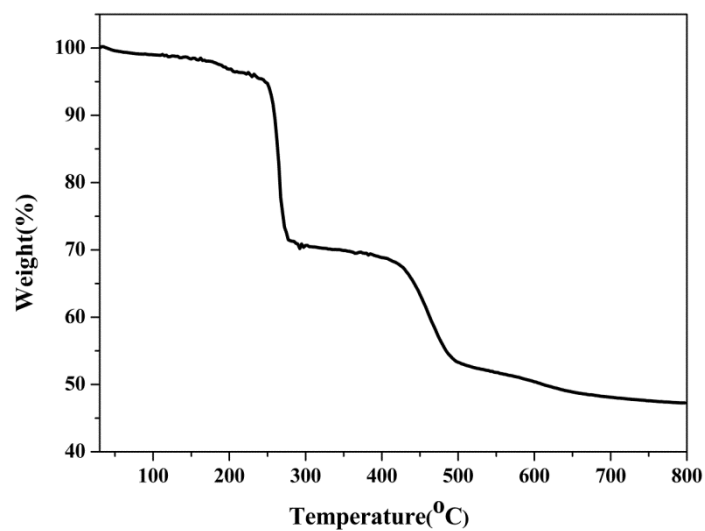

Fig. S4. TGA plots of **PTC-95**.

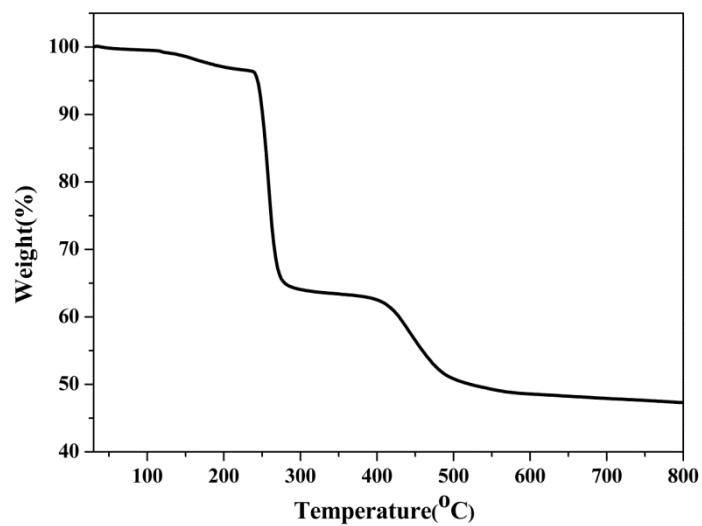

Fig. S5. TGA plots of **PTC-96**.

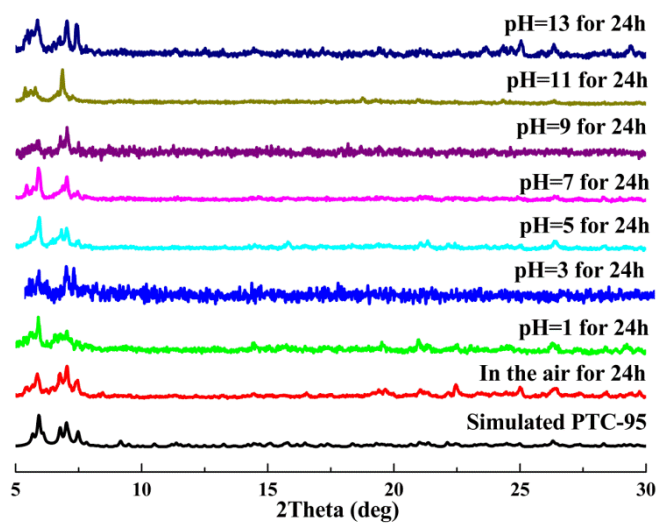

Fig. S6. Chemical stability tests of **PTC-95**.

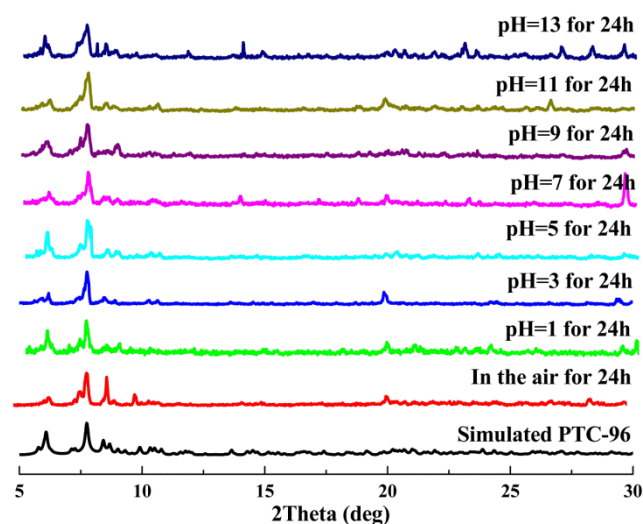

Fig. S7. Chemical stability tests of **PTC-96**.

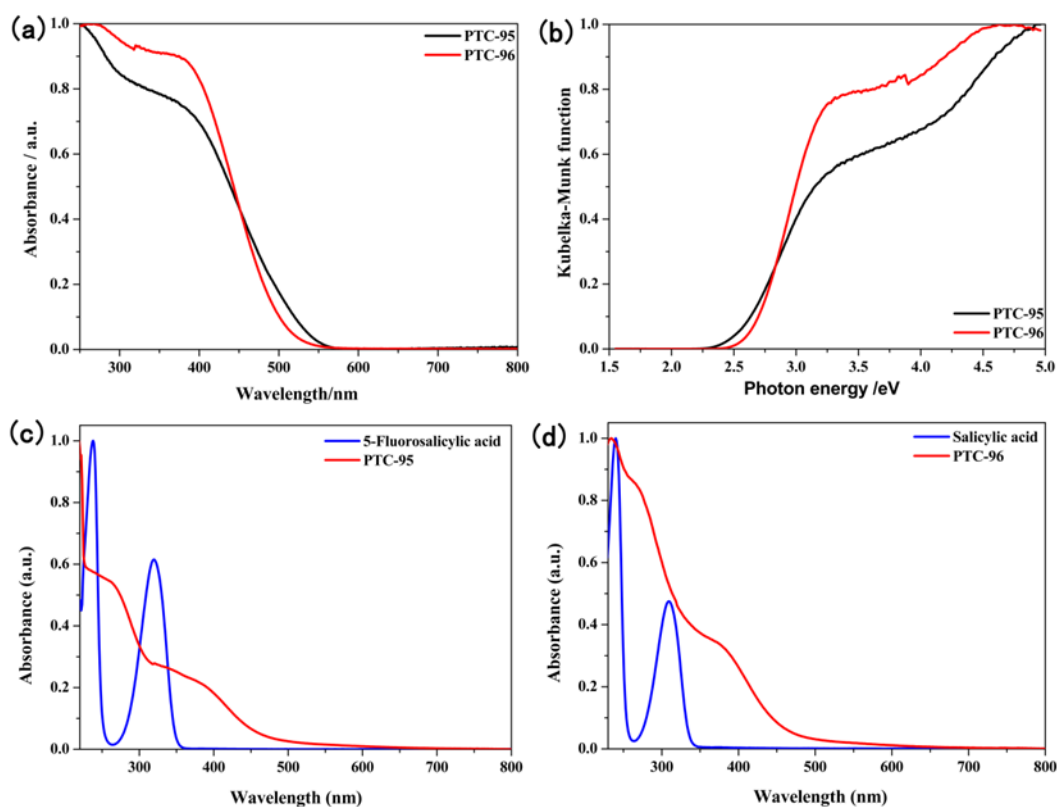

Fig. S8. (a) Solid-state UV-vis absorption spectra of **PTC-95** and **PTC-96**, respectively. (b) Kubelka–Munk transformation of diffuse reflectance data. (c) Solution UV-vis spectra of **PTC-95** and 5-fluorosalicic acid in CH<sub>2</sub>Cl<sub>2</sub>. (d) Solution UV-vis spectra of **PTC-96** and salicylic acid in CH<sub>2</sub>Cl<sub>2</sub>.

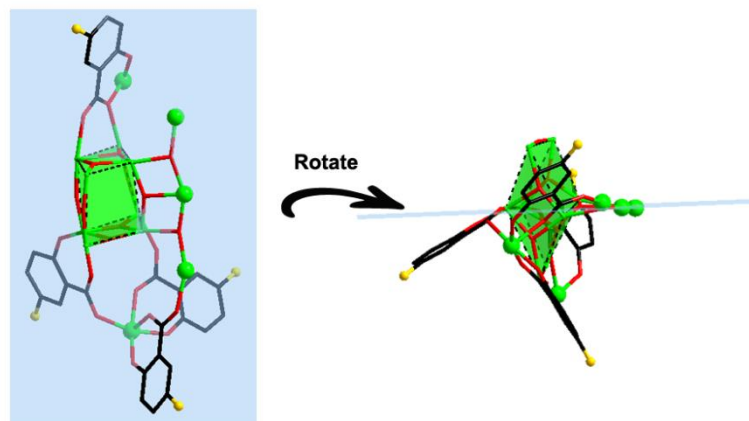

Fig. S9. The perspective view and side view of **PTC-95**.

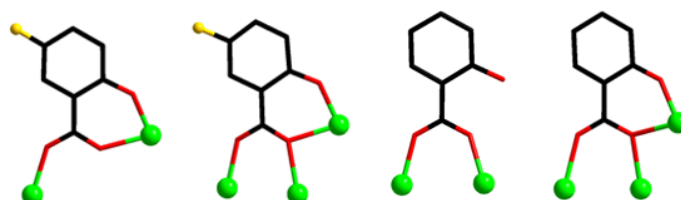

Fig. S10. Coordination modes of 5-fluorosalicylic acid and salicylic acid in **PTC-95** ( $\mu_2\text{-}\eta^1\text{:}\eta^1$ ;  $\mu_3\text{-}\eta^1\text{:}\eta^2\text{:}\eta^1$ ) and **PTC-96** ( $\mu_2\text{-}\eta^1\text{:}\eta^1\text{:}\eta^0$ ;  $\mu_3\text{-}\eta^1\text{:}\eta^2\text{:}\eta^1$ ).

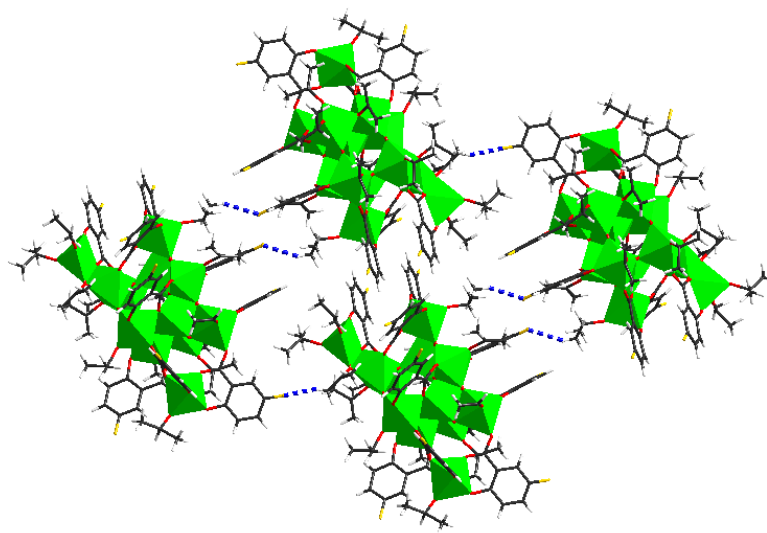

Fig. S11. Weak Hydrogen bonding interaction in **PTC-95**.

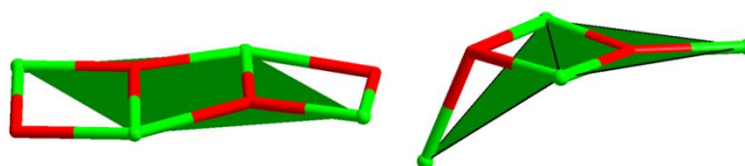

Fig. S12. Comparison of  $\text{Ti}_4$  in **PTC-95** (left) and **PTC-96** (right).

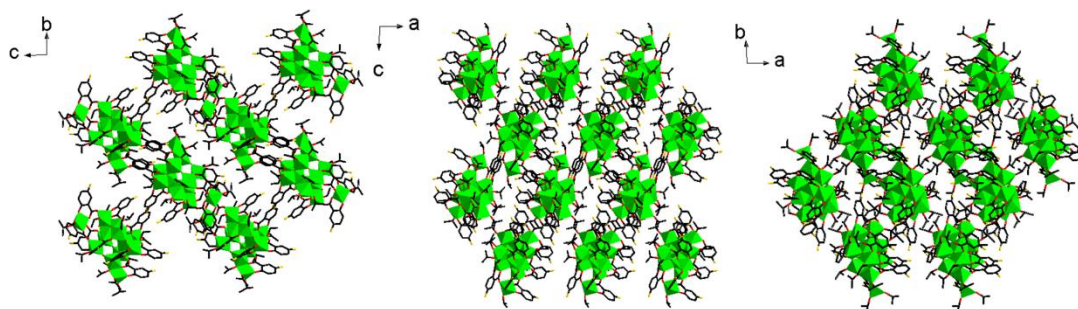

Fig. S13. The packing-view of **PTC-95** along with the [100], [010], and [001] direction.

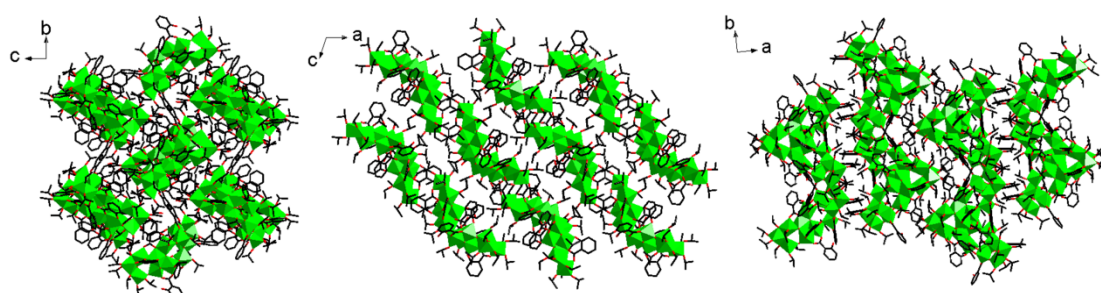

Fig. S14. The packing-view of **PTC-96** along with the [100], [010], and [001] direction.

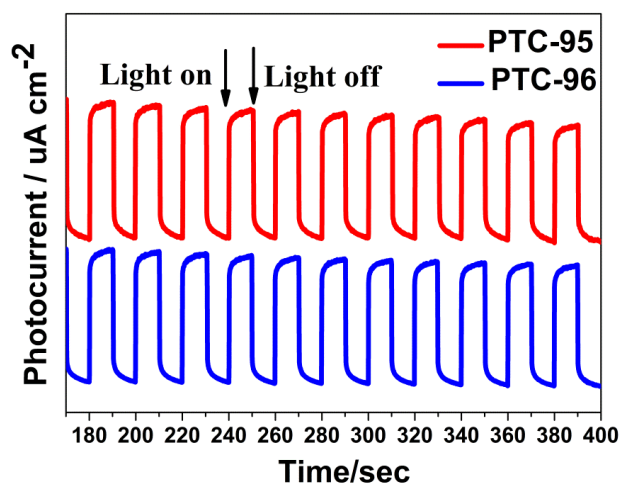

Fig.S15. Photocurrent responses of **PTC-95** and **PTC-96** in a 0.2 M  $\text{Na}_2\text{SO}_4$  aqueous solution with 0.8 V (vs NHE) bias under full spectrum. The photocurrent densities were 0.2308 and 0.2275  $\mu\text{A}\cdot\text{cm}^{-2}$  for **PTC-95** and **PTC-96**, respectively.

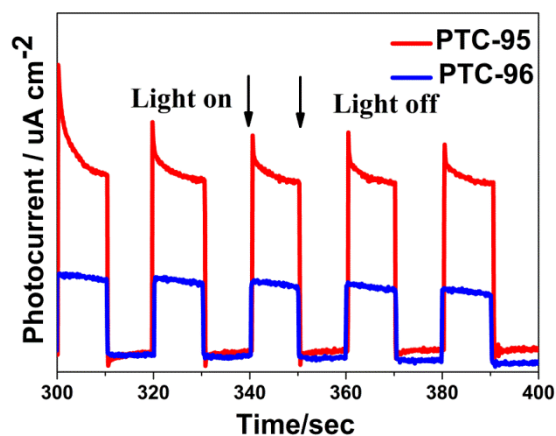

Fig.S16. Photocurrent responses of **PTC-95** and **PTC-96** in a 0.2 M  $\text{Na}_2\text{SO}_4$  aqueous solution with 0 V (vs NHE) bias under repetitive visible light irradiate. The photocurrent densities were 0.0567 and 0.0241  $\mu\text{A}\cdot\text{cm}^{-2}$  for **PTC-95** and **PTC-96**, respectively.

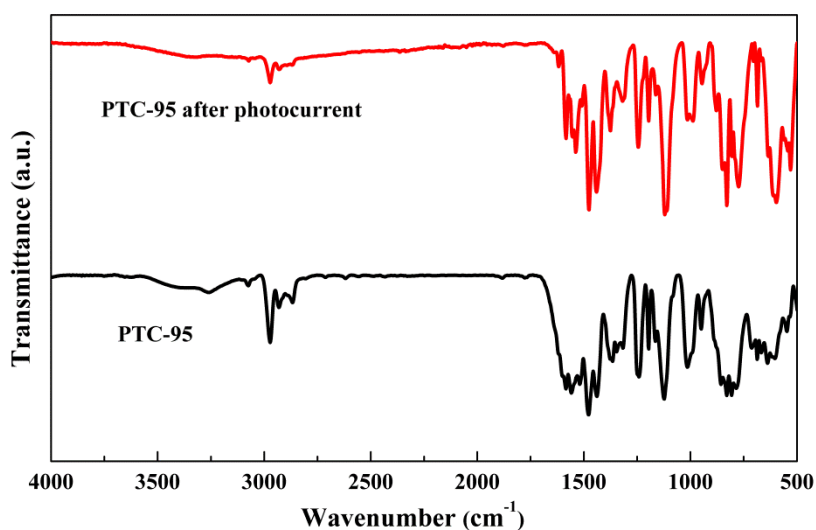

Fig. S17. Comparison of IR spectra of **PTC-95** before and after photocurrent test.

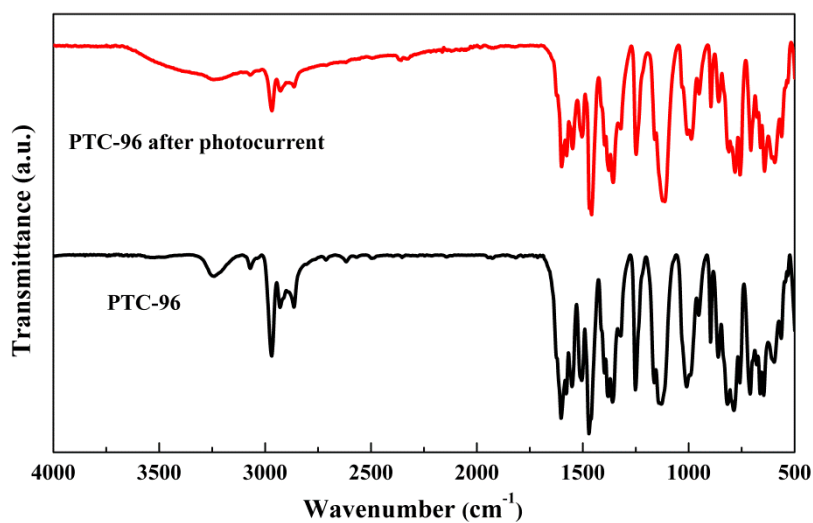

Fig. S18. Comparison of IR spectra of **PTC-96** before and after photocurrent test.

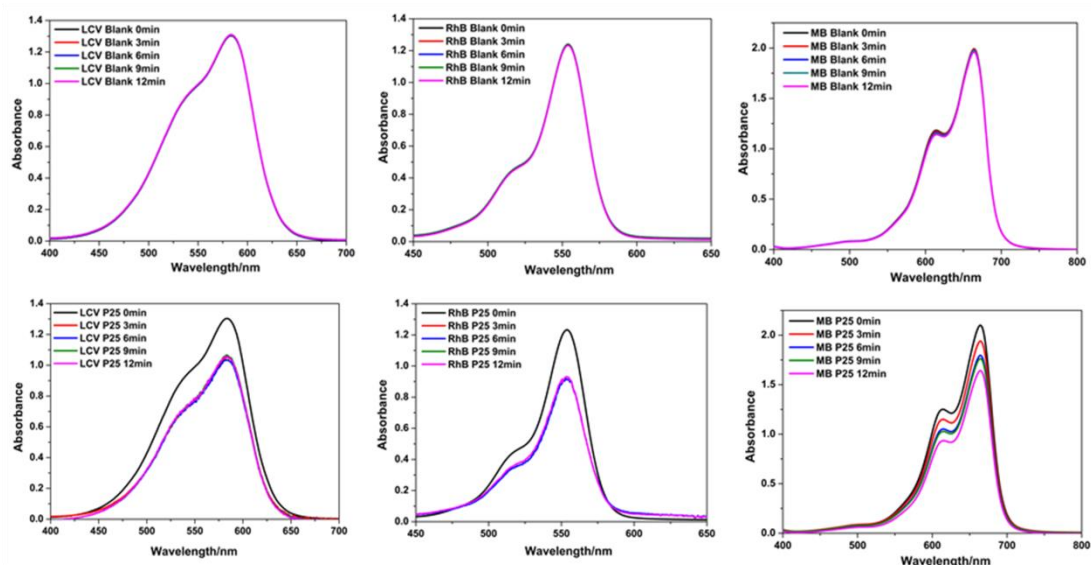

Fig. S19. The changes of UV-vis spectra of different dyes aqueous solutions (pH=7) on irradiation with visible light in blank (up) and in the presence of P25 (down).

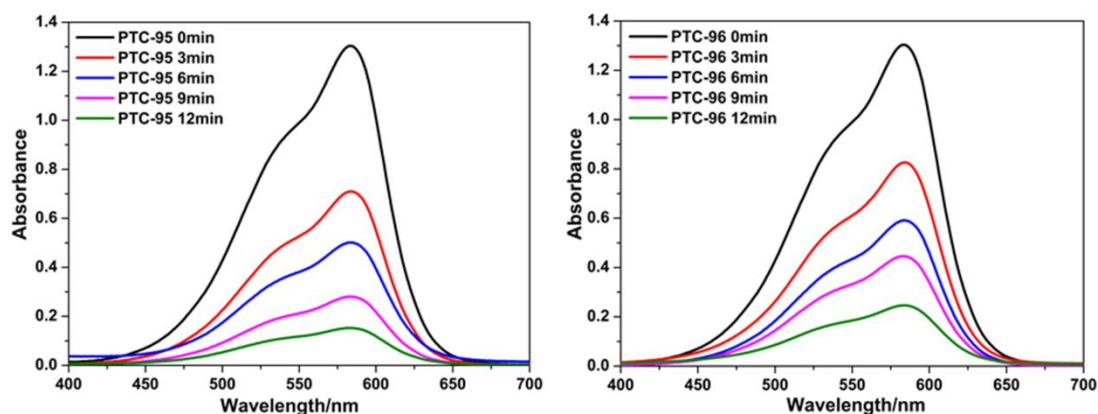

Fig. S20. The changes of UV-vis spectra of Leucocrystal Violet (LCV) aqueous solutions (30ppm) at pH=7 in the presence of PTC-95 and PTC-96, respectively.

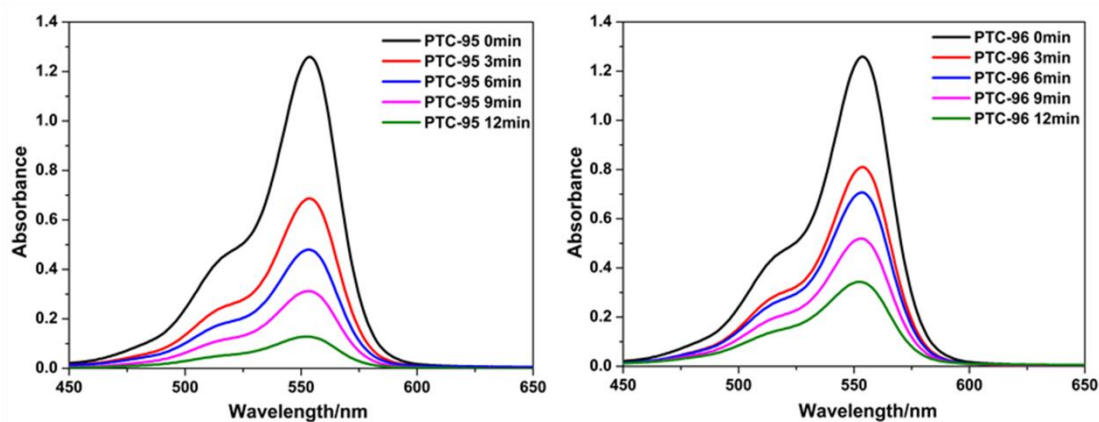

Fig. S21. The changes of UV-vis spectra of Rhodamine B (RhB) aqueous solutions (30ppm) at pH=7 in the presence of PTC-95 and PTC-96, respectively.



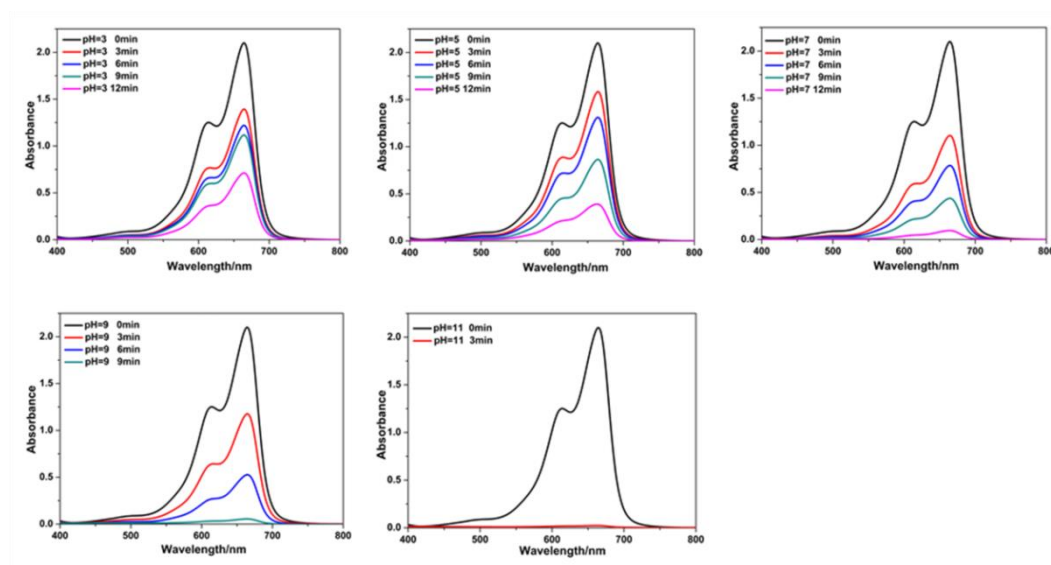

Fig. S22. The changes of UV-vis spectra of MB aqueous solutions at different pH in the presence of **PTC-95**.

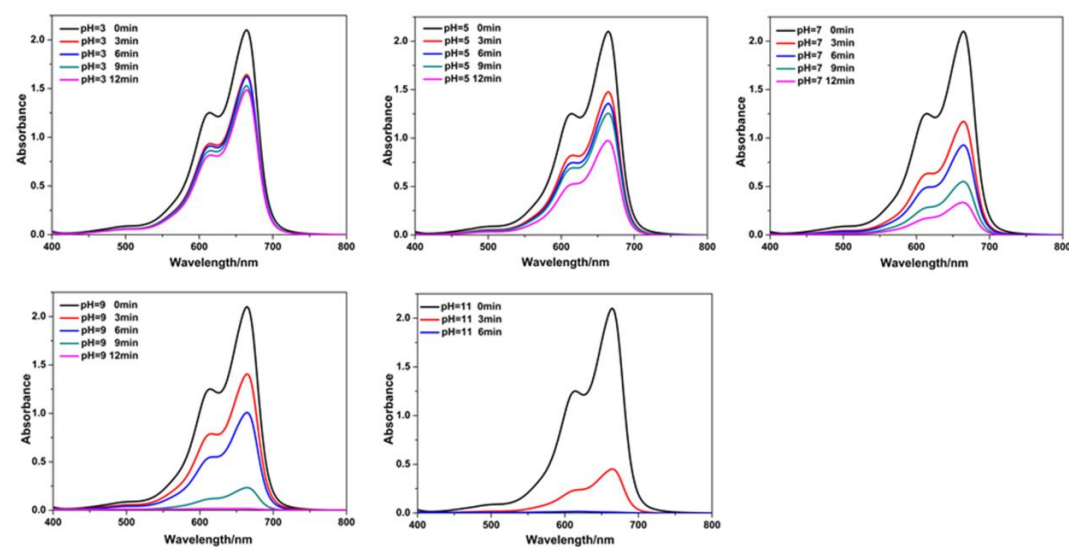

Fig. S23. The changes of UV-vis spectra of MB aqueous solutions at different pH in the presence of **PTC-96**.

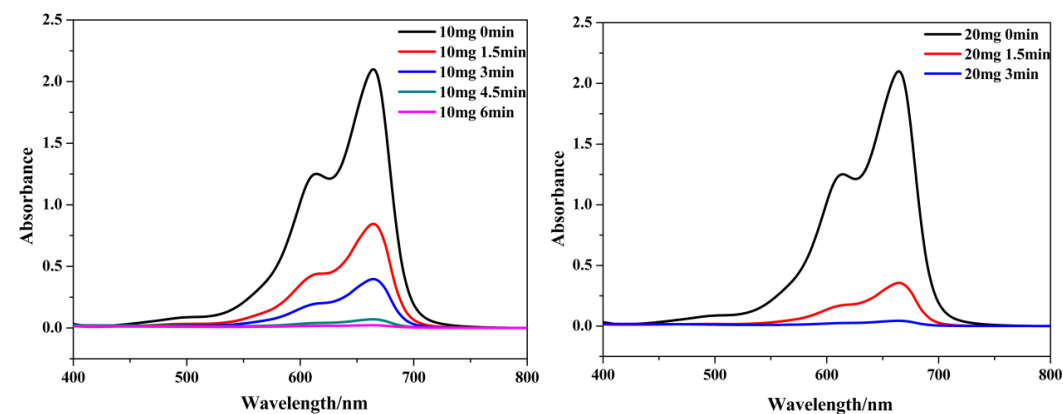

Fig. S24. The changes of UV-vis spectra of MB aqueous solutions (pH=11) with different quantities of **PTC-95**.

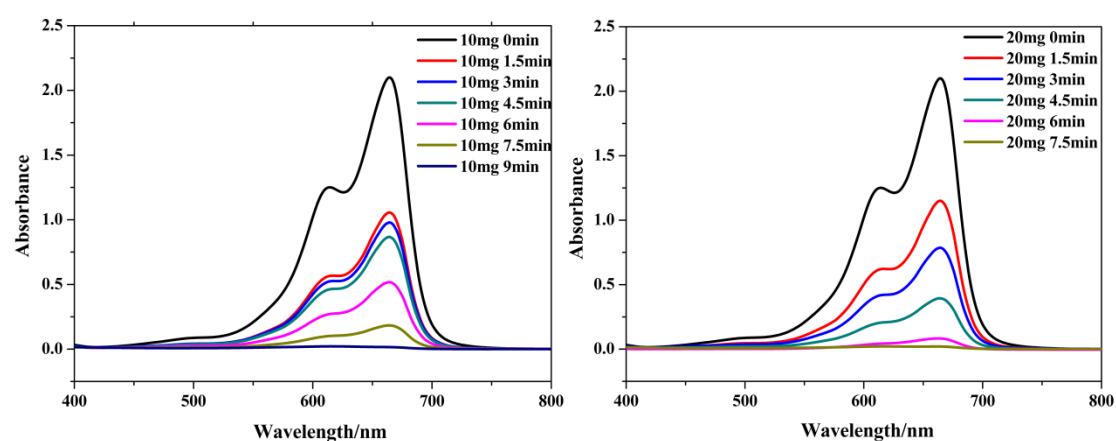

Fig. S25. The changes of UV-vis spectra of MB aqueous solutions (pH=11) with different quantities of **PTC-96**.

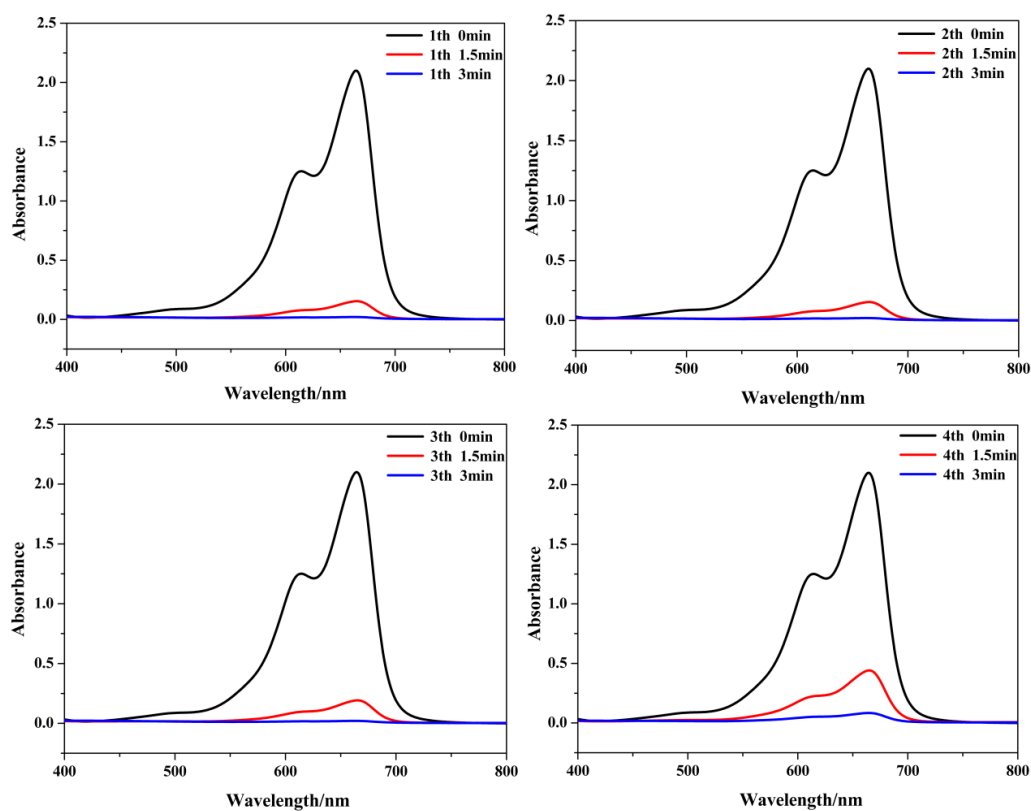

Fig. S26. Recycling tests of UV-vis spectra of MB aqueous solutions (pH=11) in the presence of **PTC-95**.

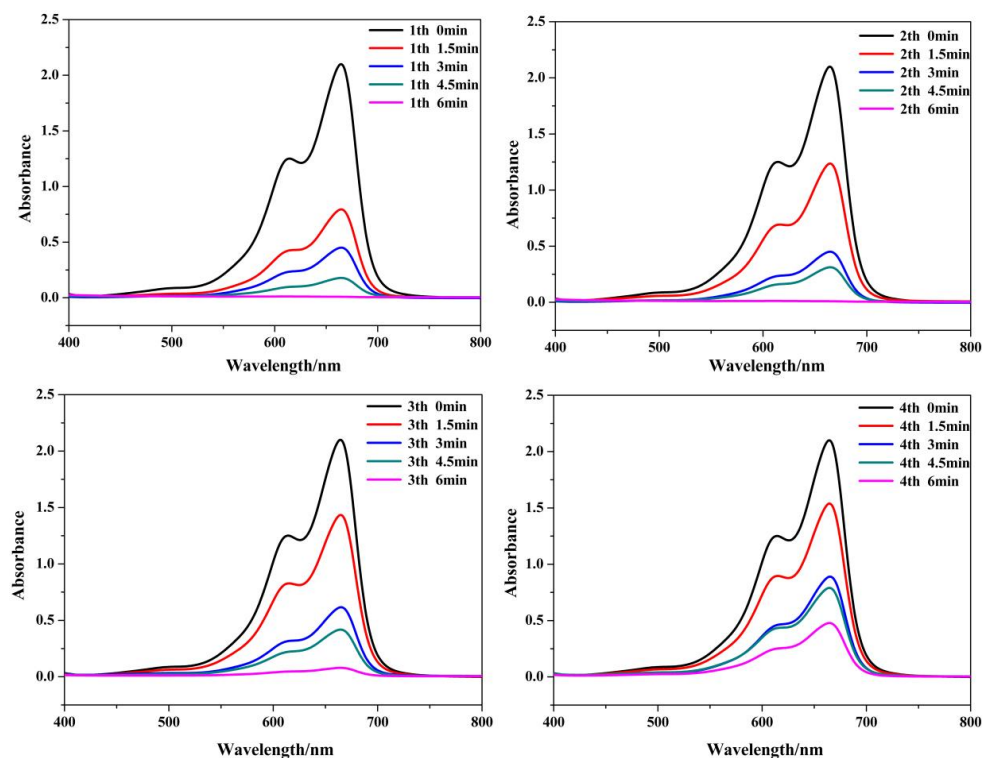

Fig. S27. Recycling tests of UV-vis spectra of MB aqueous solutions (pH=11) in the presence of **PTC-96**.

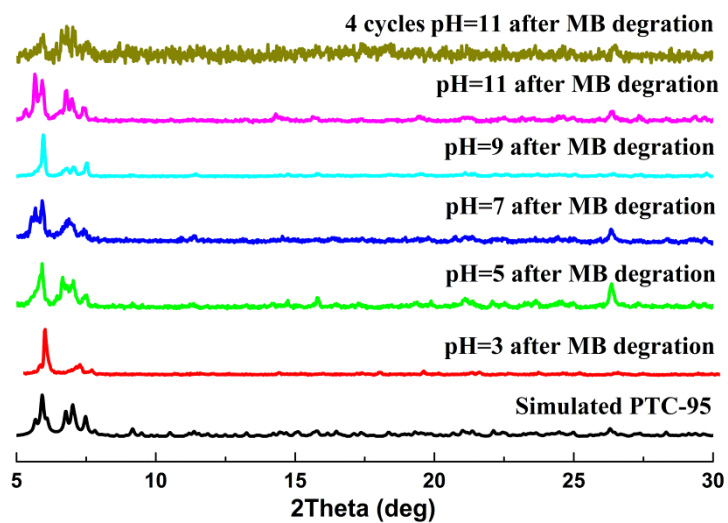

Fig. S28. The powder patterns of compound **PTC-95** after MB degradation.

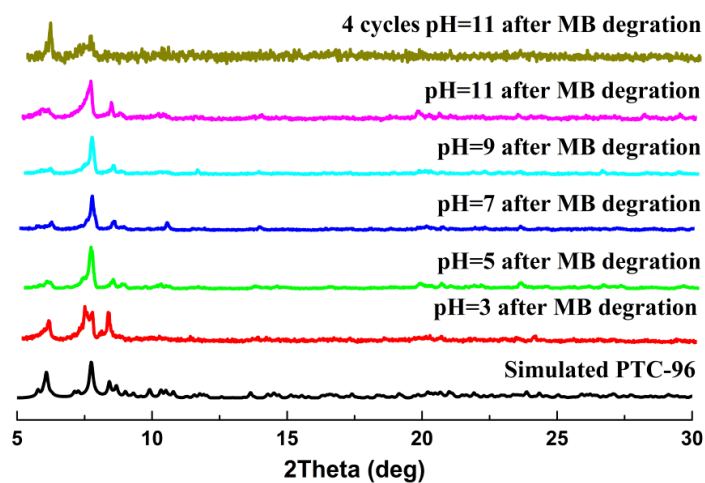

Fig. S29 The powder patterns of compound **PTC-96** after MB degradation.

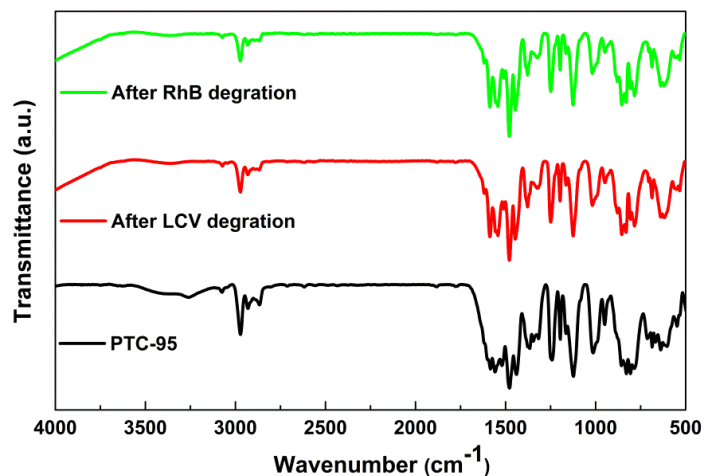

Fig. S30. Comparison of IR spectra of **PTC-95** before and after Leucocystal Violet (LCV), Rhodamine B (RhB) degradation, respectively.

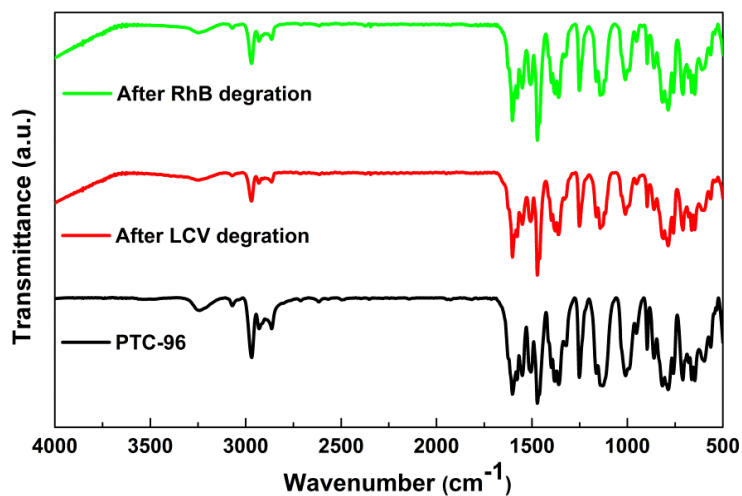

Fig. S31. Comparison of IR spectra of **PTC-96** before and after Leucocystal Violet (LCV), Rhodamine B (RhB) degradation, respectively.

Table S1. Hydrogen bonds for **PTC-95** [Å and °].

| D-H...A                  | d(D-H) | d(H...A) | d(D...A)  | <(DHA) |
|--------------------------|--------|----------|-----------|--------|
| C(034)-H(03D)...O(00T)#2 | 0.93   | 2.55     | 3.414(9)  | 154.5  |
| C(03B)-H(03J)...O(01S)   | 0.93   | 2.55     | 3.352(10) | 144.3  |
| C(03U)-H(03V)...O(01P)   | 0.96   | 2.63     | 3.399(10) | 137.6  |
| C(045)-H(04M)...O(00U)   | 0.96   | 2.59     | 3.161(11) | 118.1  |
| C(04H)-H(05N)...F(01M)#3 | 0.96   | 2.57     | 3.204(12) | 123.8  |
| C(04I)-H(05Q)...F(01W)#4 | 0.96   | 2.53     | 3.418(12) | 153.7  |
| C(04R)-H(06J)...F(02B)#5 | 0.96   | 2.33     | 3.133(17) | 140.5  |

Symmetry transformations used to generate equivalent atoms:

#1 -x+1,-y+2,-z+1; #2 -x+1,-y+1,-z; #3 -x,-y+1,-z; #4 -x+1,-y+2,-z; #5 x,y-1,z

Table S2. Hydrogen bonds for **PTC-96** [Å and °].

| D-H...A               | d(D-H) | d(H...A) | d(D...A)  | <(DHA) |
|-----------------------|--------|----------|-----------|--------|
| O(50)-H(50)...O(44)   | 0.82   | 1.90     | 2.587(5)  | 140.1  |
| O(79)-H(79)...O(38)   | 0.82   | 1.88     | 2.599(6)  | 144.9  |
| C(89)-H(89C)...O(4)   | 0.96   | 2.55     | 3.267(6)  | 131.8  |
| C(105)-H(10C)...O(22) | 0.96   | 2.53     | 3.232(6)  | 130.4  |
| C(113)-H(11F)...O(24) | 0.96   | 2.63     | 3.240(7)  | 121.8  |
| C(130)-H(13C)...O(26) | 0.96   | 2.50     | 3.235(7)  | 133.3  |
| C(146)-H(14I)...O(48) | 0.96   | 2.59     | 3.271(8)  | 128.4  |
| O(104)-H(104)...O(17) | 0.82   | 2.26     | 3.066(6)  | 167.0  |
| C(3AA)-H(3AA)...O(81) | 0.96   | 2.64     | 3.274(10) | 123.6  |
